# Supplementary material for: Grain growth of natural and synthetic ice at 0 °C
Source: Copernicus journal article supplement (doi:10.5194/tc-17-3443-2023), 2023-08-23
Supplement: Supplementary file 1 [file tc-17-3443-2023-supplement.pdf]

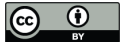

*Supplement of*

## **Grain growth of natural and synthetic ice at 0 °C**

**Sheng Fan et al.**

*Correspondence to:* Sheng Fan (sf726@cam.ac.uk, sheng.fan@otago.ac.nz, s.fan@rscmme.com)

The copyright of individual parts of the supplement might differ from the article licence.

## Contents of this file

Section S1: include Figure S1 and Figure S2

### Section S1 Details of the rig used for annealing experiments

Figure S1 shows the design of Rig01, which was used for long-term annealing experiments (up to 33 days). Rig01 is made up of two aluminium sample bins, a clamp system, and a chilly bin.

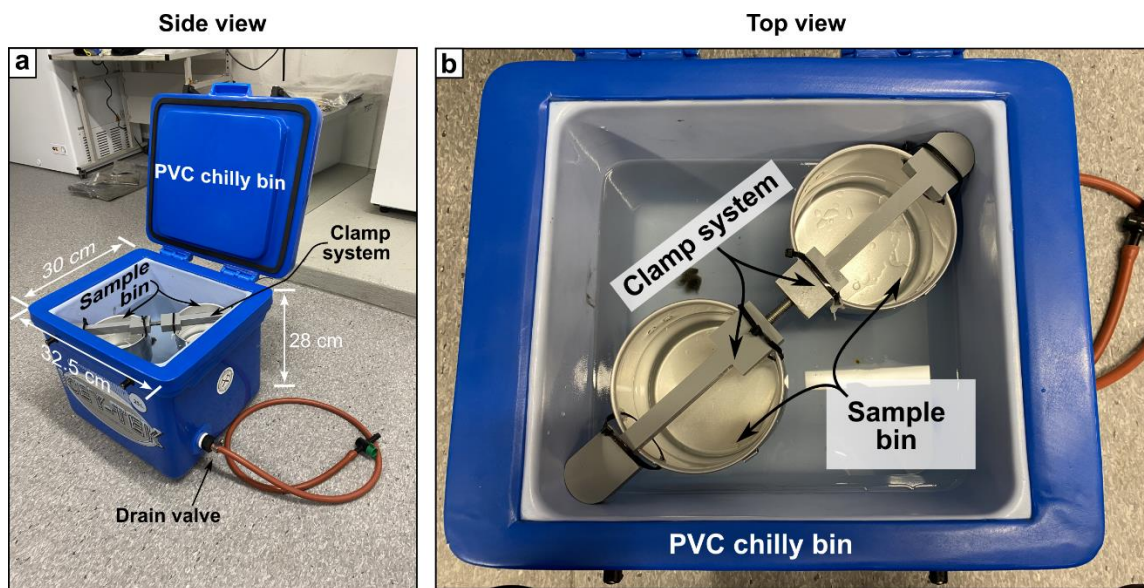

**Figure S1.** Details of the rig used for long-term annealing experiments (up to 33 days).

Figure S2 shows the design of the aluminium vessel (for Rig02) used for short-term annealing experiments (up to 5 days). The Aluminium vessel is made up of a base, which contains a sample chamber, and a cap. The vessel is sealed by a rubber ring on the cap.

**Base**

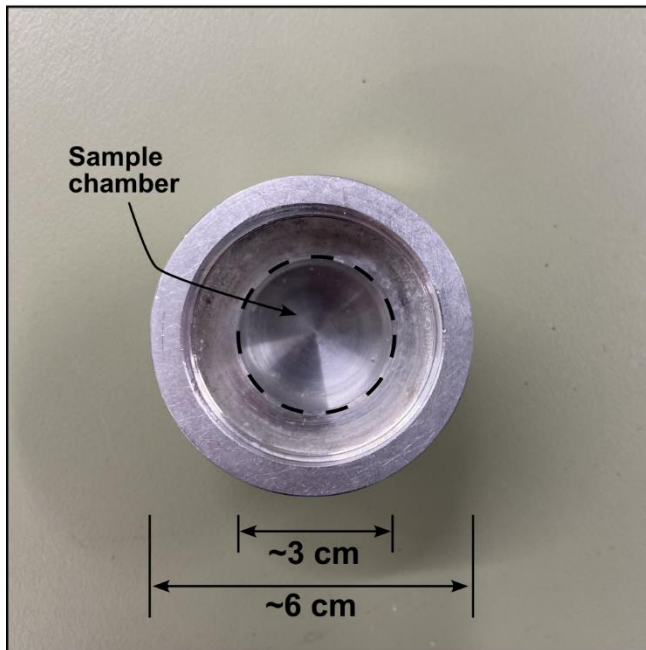

**Cap**

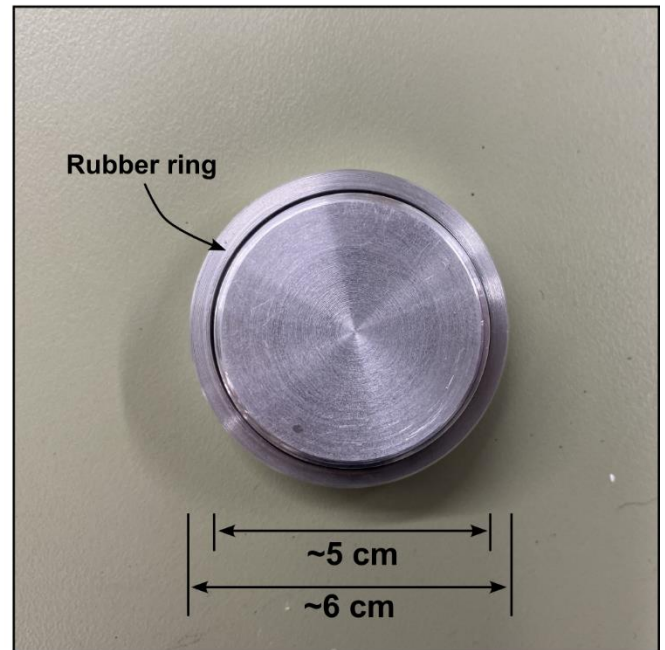

**Figure S2.** Details of the aluminium vessel used for short-term annealing experiments (up to 5 days).
